# Supplementary material
Source: HighWire-hosted journal article supplement (https://bmjopen.bmj.com/content/10/4/e036598)
Supplement: inline-supplementary-material-1 [file inline-supplementary-material-1.pdf]

## Supplementary Material 1

**CODE-EM Family Survey Tool****CODE-EM Questionnaire**

|    |                                                                                                                                                                   |                       |              |                |                 |                          |
|----|-------------------------------------------------------------------------------------------------------------------------------------------------------------------|-----------------------|--------------|----------------|-----------------|--------------------------|
| 1. | There was enough help with <b>nursing care in the ED</b> , such as giving medicines, changing diapers and helping the patient find a comfortable position in bed. | <i>Strongly agree</i> | <i>Agree</i> | <i>Neutral</i> | <i>Disagree</i> | <i>Strongly disagree</i> |
| 2. | The bed area in the ED and surrounding environment was comfortable for the <b>patient</b> .                                                                       | <i>Strongly agree</i> | <i>Agree</i> | <i>Neutral</i> | <i>Disagree</i> | <i>Strongly disagree</i> |
| 3. | The bed area in the ED and surrounding environment was comfortable for the <b>family</b> .                                                                        | <i>Strongly agree</i> | <i>Agree</i> | <i>Neutral</i> | <i>Disagree</i> | <i>Strongly disagree</i> |
| 4. | The bed area in the ED and surrounding environment had adequate privacy for the patient                                                                           | <i>Strongly agree</i> | <i>Agree</i> | <i>Neutral</i> | <i>Disagree</i> | <i>Strongly disagree</i> |

|    |                                                                                                   |                            |                             |                                      |
|----|---------------------------------------------------------------------------------------------------|----------------------------|-----------------------------|--------------------------------------|
| 5. | Did you have <b>confidence and trust</b> in the <b>ED nurses</b> who were caring for the patient? | <i>Yes, in all of them</i> | <i>Yes, in some of them</i> | <i>No, not in any of the nurses</i>  |
| 6. | Did you have confidence and trust in the <b>ED doctors</b> who were caring for the patient?       | <i>Yes, in all of them</i> | <i>Yes, in some of them</i> | <i>No, not in any of the doctors</i> |

|    |                                                                                                     |                      |                       |                                       |                                      |
|----|-----------------------------------------------------------------------------------------------------|----------------------|-----------------------|---------------------------------------|--------------------------------------|
| 7. | In your opinion, during the patient's stay in the ED, did the patient appear to be in <b>pain</b> ? | Yes, all of the time | Yes, some of the time | No, s/he did not appear to be in pain |                                      |
| 8. | In your view, did the doctors and nurses in the ED do enough to help relieve the pain?              | Yes, all of the time | Yes, some of the time | No, not at all                        | Not applicable, s/he was not in pain |

|     |                                                                                                                  |                             |                              |                                               |                                              |
|-----|------------------------------------------------------------------------------------------------------------------|-----------------------------|------------------------------|-----------------------------------------------|----------------------------------------------|
| 9.  | In your opinion, during the stay in the ED, did the patient appear to be <b>restless</b> ?                       | <i>Yes, all of the time</i> | <i>Yes, some of the time</i> | <i>No, s/he did not appear to be restless</i> |                                              |
| 10. | In your view, did the doctors and nurses in the emergency department do enough to help relieve the restlessness? | <i>Yes, all of the time</i> | <i>Yes, some of the time</i> | <i>No, not at all</i>                         | <i>Not applicable, s/he was not restless</i> |

|     |                                                                                                                 |                      |                       |                                                       |                                                                   |
|-----|-----------------------------------------------------------------------------------------------------------------|----------------------|-----------------------|-------------------------------------------------------|-------------------------------------------------------------------|
| 11. | In your opinion, during the stay in the ED, did the patient appear to have a “noisy rattle” when breathing?     | Yes, all of the time | Yes, some of the time | No, s/he did not have a noisy rattle to the breathing |                                                                   |
| 12. | In your view, did the doctors and nurses in the ED do enough to help relieve the “noisy rattle” when breathing? | Yes, all of the time | Yes, some of the time | No, not at all                                        | Not applicable, s/he did not have a noisy rattle to the breathing |

|     |                                                                                                                            |                      |                       |                                            |                                                        |
|-----|----------------------------------------------------------------------------------------------------------------------------|----------------------|-----------------------|--------------------------------------------|--------------------------------------------------------|
| 13. | In your opinion, during the stay in the emergency department, did the patient appear to have <b>difficulty breathing</b> ? | Yes, all of the time | Yes, some of the time | No, s/he did not have difficulty breathing |                                                        |
| 14. | In your view, did the doctors and nurses in the emergency department do enough to help relieve the breathing difficulty?   | Yes, all of the time | Yes, some of the time | No, not at all                             | Not applicable, s/he did not have difficulty breathing |

|     |                                                                                                                                           |                       |              |                |                  |                          |
|-----|-------------------------------------------------------------------------------------------------------------------------------------------|-----------------------|--------------|----------------|------------------|--------------------------|
| 15. | During the time in the ED, the patient's care and treatment was <b>discussed</b> with you and/or the family.                              | <i>Strongly agree</i> | <i>Agree</i> | <i>Neutral</i> | <i>Disagree</i>  | <i>Strongly disagree</i> |
| 16. | The healthcare team at the ED explained the patient's condition and treatment in a way you found <b>easy or difficult to understand</b> . | <i>Very easy</i>      | <i>Easy</i>  | <i>Neutral</i> | <i>Difficult</i> | <i>Very Difficult</i>    |
| 17. | How would you assess the <b>overall level of emotional support</b> given to you by the ED healthcare team?                                | <i>Very poor</i>      | <i>Poor</i>  | <i>Fair</i>    | <i>Good</i>      | <i>Excellent</i>         |
| 18. | The ED healthcare team discussed the patient's <b>religious or spiritual needs</b> .                                                      | <i>Strongly agree</i> | <i>Agree</i> | <i>Neutral</i> | <i>Disagree</i>  | <i>Strongly disagree</i> |

|      |                                                                |            |           |
|------|----------------------------------------------------------------|------------|-----------|
| 19.  | Were you told that the patient would be likely to die soon?    | <i>Yes</i> | <i>No</i> |
| 19a) | If yes, <b>who</b> told you s/he was likely to pass away soon? |            |           |

|      |                                                                                                                                  |            |           |
|------|----------------------------------------------------------------------------------------------------------------------------------|------------|-----------|
| 20.  | Did a member of the ED healthcare team talk to you about what to expect during the dying process (e.g. what symptoms may arise)? | <i>Yes</i> | <i>No</i> |
| 20a) | <b>If yes</b> → Was the discussion about what to expect during the dying process helpful?                                        | <i>Yes</i> | <i>No</i> |
| 20b) | <b>If no</b> → Would a discussion about what to expect during the dying process have been helpful?                               | <i>Yes</i> | <i>No</i> |

|     |                                                                                                  |                       |              |                |                 |                          |
|-----|--------------------------------------------------------------------------------------------------|-----------------------|--------------|----------------|-----------------|--------------------------|
| 21. | In your view, the patient was treated with <b>respect and dignity</b> by the <b>ED doctors</b> . | <i>Strongly agree</i> | <i>Agree</i> | <i>Neutral</i> | <i>Disagree</i> | <i>Strongly disagree</i> |
| 22. | In your view, the patient treated with respect and dignity by the <b>ED nurses</b> .             | <i>Strongly agree</i> | <i>Agree</i> | <i>Neutral</i> | <i>Disagree</i> | <i>Strongly disagree</i> |

|     |                                                                                          |            |           |
|-----|------------------------------------------------------------------------------------------|------------|-----------|
| 23. | Overall, in your opinion, were you adequately supported during the patient's stay in ED? | <i>Yes</i> | <i>No</i> |
|-----|------------------------------------------------------------------------------------------|------------|-----------|

-----THE END -----
